# Supplementary material for: A Case Series and Literature Review of Telogen Effluvium and Alopecia Universalis after the Administration of a Heterologous COVID-19 Vaccine Scheme
Source: MDPI journal article supplement (doi:10.3390/vaccines11020444), 2023-02-15
Supplement: s1 [file s1]

**Supplementary File S1.** Literature review of patients who developed Alopecia Areata after COVID-19 vaccination.

| Title                                                                                              | Author / Date                     | n patient | Age / Gender | Ethnicity | Family history | Personal history                   | Vaccine received              | Symptoms               | Post-vaccination onset time | Therapy                                        | Evolution |
|----------------------------------------------------------------------------------------------------|-----------------------------------|-----------|--------------|-----------|----------------|------------------------------------|-------------------------------|------------------------|-----------------------------|------------------------------------------------|-----------|
| Alopecia areata after ChAdOx1 nCoV-19 vaccine (Oxford/AstraZeneca): a potential triggering factor? | Essam R. et al. / August 2021     | 1         | 32 / F       | ND        | No             | AA                                 | AstraZeneca (1st dose)        | Head AA                | A few days later            | ND                                             | ND        |
| Recurrence of alopecia areata after covid-19 vaccination: A report of three cases in Italy         | Rossi et al. / November 2021      | 3         | 1) 76 / F    | ND        | ND             | 1) AA                              | 1) Pfizer/BioNTech (1st dose) | 1) Head AA             | 1) 2 weeks                  | ND                                             | ND        |
|                                                                                                    |                                   |           | 2) 59 / F    | ND        | ND             | 2) AA                              | 2) AstraZeneca (1st dose)     | 2) Head AA             | 2) 3 weeks                  | ND                                             | ND        |
|                                                                                                    |                                   |           | 3) 29 / F    | ND        | ND             | 3) AA                              | 3) AstraZeneca (1st dose)     | 3) Head AA             | 3) 2 weeks                  | ND                                             | ND        |
| COVID-19 vaccination and alopecia areata: a case report and literature review                      | Ganjei Z. et al. / February 2022  | 2         | 1) 23 / F    | ND        | 1) No          | 1) No                              | 1) AstraZeneca (1st dose)     | 1) Head and eyebrow AA | 1) 1 week                   | 1) Betamethasone + Pimecrolimus - Prednisolone | ND        |
|                                                                                                    |                                   |           | 2) 26 / F    | ND        | 2) No          | 2) AA                              | 2) AstraZeneca (2nd dose)     | 2) Head AA             | 2) 2 weeks                  | 2) Prednisolone                                | ND        |
| Alopecia areata after SARS-CoV-2 vaccination                                                       | Scollan M. et al. / February 2022 | 9         | 1) 33 / F    | ND        | 1) AA brother  | 1) Hepatitis B                     | 1) Modern (2nd dose)          | 1) Head AA             | 1) 2 months                 | 1) Tofacitinib                                 | ND        |
|                                                                                                    |                                   |           | 2) 57 / F    | ND        | 2) No          | 2) AA                              | 2) Pfizer/BioNTech (2nd dose) | 2) Head AA             | 2) 4 months                 | 2) Tofacitinib                                 | ND        |
|                                                                                                    |                                   |           | 3) 62 / F    | ND        | 3) No          | 3) AA                              | 3) Modern (2nd dose)          | 3) AU                  | 3) 2 months                 | 3) Tofacitinib                                 | ND        |
|                                                                                                    |                                   |           | 4) 28 / F    | ND        | 4) No          | 4) AA + Hashimoto's thyroiditis    | 4) Pfizer/BioNTech (2nd dose) | 4) AU                  | 4) 1 week                   | 4) Tofacitinib                                 | ND        |
|                                                                                                    |                                   |           | 5) 29 / F    | ND        | 5) No          | 5) Anti Tg and Anti TPO antibodies | 5) Pfizer/BioNTech (2nd dose) | 5) Head AA             | 5) 1 week                   | 5) Triamcinolone intralesion                   | ND        |

|                                                                                                    |                                  |   |           |       |                                        |                                    |                               |                                     |                             |                                                                           |                             |
|----------------------------------------------------------------------------------------------------|----------------------------------|---|-----------|-------|----------------------------------------|------------------------------------|-------------------------------|-------------------------------------|-----------------------------|---------------------------------------------------------------------------|-----------------------------|
|                                                                                                    |                                  |   | 6) 22 / M | ND    | 6) No                                  | 6) Anti Tg and Anti TPO antibodies | 6) Moderna (2nd dose)         | 6) Head and beard AA                | 6) 1 month                  | 6) Tofacitinib                                                            | ND                          |
|                                                                                                    |                                  |   | 7) 15 / M | ND    | 7) Hashimoto's thyroiditis grandmother | 7) No                              | 7) Pfizer/BioNTech (2nd dose) | 7) AA head                          | 7) 1 week                   | 7) Triamcinolone intralesion                                              | ND                          |
|                                                                                                    |                                  |   | 8) 61 / M | ND    | 8) No                                  | 8) No                              | 8) Pfizer/BioNTech (1st dose) | 8) AT                               | 8) 2 weeks                  | 8) None                                                                   | ND                          |
|                                                                                                    |                                  |   | 9) 16 / M | ND    | 9) No                                  | 9) No                              | 9) Pfizer/BioNTech (1st dose) | 9) AA head, eyebrows, and eyelashes | 9) 1 to 2 weeks             | 9) Tofacitinib                                                            | ND                          |
| Intractable alopecia areata following the second dose of COVID-19 vaccination: Report of two cases | Chen C. et al. / June 2022       | 2 | 1) 29 / M | ND    | 1) No                                  | 1) AA                              | 1) AstraZeneca (2nd dose)     | 1) AA head                          | 1) 1 week                   | 1) Corticosteroid therapy in pulses                                       | No improvement              |
|                                                                                                    |                                  |   | 2) 26 / F | ND    | 2) No                                  | 2) AA                              | 2) Pfizer/BioNTech (2nd dose) | 2) AU                               | 2) 2 weeks                  | 2) Corticosteroid therapy in pulses                                       | No improvement              |
| Alopecia areata after COVID-19 vaccination                                                         | Gallo G. et al. / November 2022  | 1 | 31 / H    | White | No                                     | No                                 | Pfizer/BioNTech (2nd dose)    | Head and beard AA                   | The day after the injection | ND                                                                        | ND                          |
| Induction of alopecia areata after COVID-19 vaccination: a case report in the United States        | Lin D. A. et al. / November 2022 | 1 | 57 / M    | White | ND                                     | Psoriasis + T2DM                   | Pfizer/BioNTech (1st dose)    | Head AA                             | The day after the injection | Triamcinolone + Minoxidil + Dexamethasone Pulses - Clobetasol - Minoxidil | 95% regrowth after 8 months |

F: female, M: male, AA: alopecia areata, AU: alopecia universalis, AT: alopecia totalis, ND: no data available
